# Supplementary material for: Association between maternal gluten intake and type 1 diabetes in offspring: national prospective cohort study in Denmark
Source: PubMed Central journal article supplement — BMJ. 2018 Sep 19;362:k3547. doi: 10.1136/bmj.k3547 (PMC6283375; doi:10.1136/bmj.k3547), 2018-09-19
Supplement: antj043748.ww.pdf [file antj043748.ww.pdf]

## Web appendix: Supplementary tables

**Table S1. The association between maternal gluten intake as energy adjusted residuals<sup>1</sup> and offspring type 1 diabetes (n=67565).**

| Gluten intake                      | <i>cases (%)</i> / <i>n</i> | Unadjusted |              | Adjusted model <sup>2</sup> |              |
|------------------------------------|-----------------------------|------------|--------------|-----------------------------|--------------|
|                                    |                             | HR         | 95% CI       | HR                          | 95% CI       |
| <i>Continuous per 10g increase</i> |                             | 1.44       | (1.05, 1.98) | 1.48                        | (1.08, 2.03) |
| <i>&lt; 10 percentile</i>          | 21 (0.31%)/6766             | 1.00       | -            | 1.00                        | -            |
| <i>10-20 percentile</i>            | 13 (0.19%)/6772             | 0.64       | (0.31, 1.23) | 0.63                        | (0.32, 1.27) |
| <i>20-50 percentile</i>            | 82 (0.40%)/20305            | 1.29       | (0.80, 2.08) | 1.34                        | (0.83, 2.18) |
| <i>50-80 percentile</i>            | 71 (0.35%)/20296            | 1.11       | (0.68, 1.81) | 1.17                        | (0.71, 1.93) |
| <i>80-90 percentile</i>            | 30 (0.44%)/6742             | 1.41       | (0.81, 2.47) | 1.50                        | (0.85, 2.65) |
| <i>≥90 percentile</i>              | 30 (0.45%)/6684             | 1.43       | (0.82, 2.49) | 1.49                        | (0.85, 2.63) |
| <i>p for trend</i>                 |                             | 0.045      |              | 0.028                       |              |

<sup>1</sup> Gluten is energy adjusted according to the residual method. See Willet WW Nutritional Epidemiology chapter 11.

<sup>2</sup> Adjusted for maternal pre-pregnancy BMI, age, parity, smoking status, parental socioeconomic status, total energy, breastfeeding duration, pre-existing maternal diabetes of type II, suspected GDM, caesarean section, and offspring sex.

**Table S2. Fully adjusted association between maternal gluten intake in quintiles. Results are shown for both crude intake and energy adjusted gluten intake<sup>1</sup> according to the residual method (n=67565).**

| Gluten intake      | Gluten intake <sup>2</sup> |              | Energy adjusted gluten intake <sup>2</sup> |              |
|--------------------|----------------------------|--------------|--------------------------------------------|--------------|
|                    | HR                         | 95% CI       | HR                                         | 95% CI       |
| quintile 1         | 1.00                       | -            | 1.00                                       | -            |
| quintile 2         | 1.39                       | (0.88, 2.18) | 1.71                                       | (1.11, 2.62) |
| quintile 3         | 1.12                       | (0.68, 1.85) | 1.45                                       | (0.93, 2.27) |
| quintile 4         | 1.46                       | (0.88, 2.40) | 1.47                                       | (0.94, 2.30) |
| quintile 5         | 1.82                       | (1.08, 3.06) | 1.83                                       | (1.19, 2.81) |
| <i>p for trend</i> |                            | 0.035        |                                            | 0.022        |

<sup>1</sup> Gluten is energy adjusted according to the residual method. See Willet WW Nutritional Epidemiology chapter 11.

<sup>2</sup> Adjusted for maternal pre-pregnancy BMI, age, parity, smoking status, parental socioeconomic status, total energy, breastfeeding duration, caesarean section and offspring sex, pre-existing maternal diabetes of type II and suspected GDM cases.
